# Supplementary material for: Development of a selected reaction monitoring mass spectrometry-based assay to detect asparaginyl endopeptidase activity in biological fluids
Source: PubMed Central journal article supplement (PMC5342591; doi:10.18632/oncotarget.12224), 2016-09-23
Supplement: oncotarget-07-70822-s001.pdf [file oncotarget-07-70822-s001.pdf]

## Development of a selected reaction monitoring mass spectrometry-based assay to detect asparaginyl endopeptidase activity in biological fluids

### SUPPLEMENTARY FIGURES AND TABLES

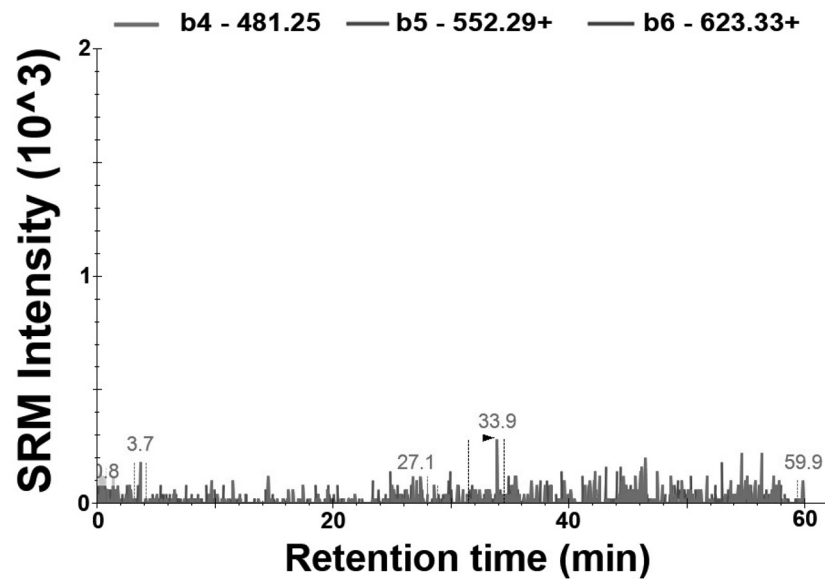

**Supplementary Figure S1: SRM responses from putative endogenous peptides in plasma.** Plasma samples from 10 healthy individuals were pooled and pH was adjusted to 5.8. Sample was incubated at 37°C for 16 hr without AEP synthetic substrate. Peptides were obtained from plasma after ACN precipitation. Sample was dried down and reconstituted with loading buffer. Sample was analyzed by SRM-MS in order to observe the background level of SRM signals from plasma.

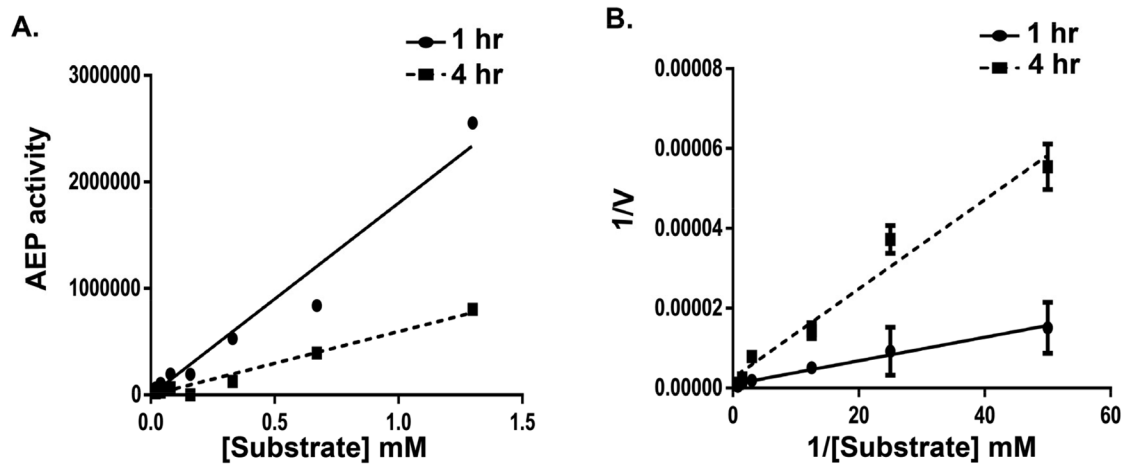

**Supplementary Figure S2: Michaelis-Menten and Lineweaver-Burk plots showing AEP activity after 1 and 4 hr of incubation with the synthetic substrate.** Rate of AEP activity was measured with different concentrations of substrate (hpyFAANDVSKvph) ranging from 0.02 mM to 1.3 mM. SRM Peak areas were used to obtain the rate of reaction for AEP activity as shown in Michaelis-Menten Curve A. Lineweaver-Burk plot was generated to calculate the  $K_m$  value ( $K_m=0.3\text{mM}$  at 1 hr and  $0.33\text{mM}$  at 4 hr) for the synthetic substrate B.  $V$  represents the amount of product formed per hour. Error bars shown are SD ( $n = 3$ ).

Supplementary Table S1: Amount of AEP detected in peripheral blood plasma using ELISA

| PlasmaSample (undiluted) | OD     | Blank OD | Actual OD | AEP Conc. (ng/ml) | STDEV  |
|--------------------------|--------|----------|-----------|-------------------|--------|
| N 1                      | 0.3740 | 0.109    | 0.2650    | 0.4123            | 0.0177 |
| N 2                      | 0.3327 | 0.109    | 0.2237    | 0.3305            | 0.0231 |
| N 3                      | 0.8393 | 0.109    | 0.7303    | 1.3334            | 0.0471 |
| N 4                      | 0.2950 | 0.109    | 0.1860    | 0.2559            | 0.0072 |
| N 5                      | 0.7547 | 0.109    | 0.6457    | 1.1658            | 0.0329 |
| N 6                      | 0.3807 | 0.109    | 0.2717    | 0.4255            | 0.0291 |
| N 7                      | 0.3643 | 0.109    | 0.2553    | 0.3932            | 0.0151 |
| N 8                      | 3.6283 | 0.109    | 3.5193    | 6.8540            | 0.0681 |
| N 9                      | 0.2697 | 0.109    | 0.1607    | 0.2058            | 0.0198 |
| N 10                     | 0.2383 | 0.109    | 0.1293    | 0.1438            | 0.0140 |
| OC 1                     | 0.5527 | 0.109    | 0.4437    | 0.7660            | 0.0207 |
| OC 2                     | 0.2050 | 0.109    | 0.0960    | 0.0778            | 0.0038 |
| OC 3                     | 1.5680 | 0.109    | 1.4590    | 2.7757            | 0.0553 |
| OC 4                     | 0.2890 | 0.109    | 0.1800    | 0.2441            | 0.0125 |
| OC 5                     | 0.5273 | 0.109    | 0.4183    | 0.7158            | 0.0199 |
| OC 6                     | 0.2050 | 0.109    | 0.0960    | 0.0778            | 0.0066 |
| OC 7                     | 0.6553 | 0.109    | 0.5463    | 0.9692            | 0.0021 |
| OC 8                     | 0.4620 | 0.109    | 0.3530    | 0.5865            | 0.0141 |
| OC 9                     | 0.2630 | 0.109    | 0.1540    | 0.1926            | 0.0070 |
| OC 10                    | 0.3777 | 0.109    | 0.2687    | 0.4196            | 0.0012 |

Commercially available ELISA was performed to detect level of total AEP in peripheral blood plasma collected from 10 healthy individuals (N) and those with ovarian cancer (OC). Plasma samples were undiluted. n=3.

**Supplementary Table S2: Amount of AEP detected in bone marrow plasma from patients with acute lymphoblastic leukaemia using ELISA**

| PlasmaSample<br>(1:10 diluted) | OD     | Blank OD | Actual OD | AEP Conc. (ng/ml) | STDEV  |
|--------------------------------|--------|----------|-----------|-------------------|--------|
| ALL1                           | 0.0996 | 0.054    | 0.0457    | 0.2091            | 0.0046 |
| ALL 2                          | 0.0903 | 0.054    | 0.0363    | 0.1333            | 0.0005 |
| ALL 3                          | 0.1603 | 0.054    | 0.1063    | 0.7015            | 0.0030 |
| ALL 4                          | 0.428  | 0.054    | 0.3740    | 2.8741            | 0.0141 |
| ALL 5                          | 0.486  | 0.054    | 0.4320    | 3.3449            | 0.0088 |
| ALL 6                          | 0.068  | 0.054    | 0.0140    | -0.0478           | 0.0043 |
| ALL 7                          | 0.965  | 0.054    | 0.9110    | 7.2329            | 0.0138 |
| ALL 8                          | 0.224  | 0.054    | 0.1703    | 1.2210            | 0.0032 |
| ALL 9                          | 0.09   | 0.0500   | 0.0400    | 0.3984            | 0.0072 |
| ALL 10                         | 0.124  | 0.050    | 0.0743    | 0.6448            | 0.0015 |
| ALL 11                         | 0.092  | 0.050    | 0.0427    | 0.4175            | 0.0046 |
| ALL 12                         | 0.0753 | 0.0500   | 0.0253    | 0.2931            | 0.0015 |
| ALL 13                         | 0.2403 | 0.0500   | 0.1903    | 1.4776            | 0.1075 |
| ALL 14                         | 0.105  | 0.0500   | 0.0550    | 0.5061            | 0.002  |

ELISA was performed to detect level of total AEP in bone marrow plasma collected from 14 patients diagnosed with childhood ALL. Plasma samples were diluted 1:10 in diluting reagent. n=3.
